# Supplementary material for: Exploring high-efficiency electrocatalysts of metal-doped two-dimensional C4N for oxygen reduction, oxygen evolution, and hydrogen evolution reactions by first-principles screening
Source: Royal Society of Chemistry journal article supplement (doi:10.1039/d2cp03795e), 2022-01-01
Supplement: d2cp03795e1.pdf [file d2cp03795e1.pdf]

## Supplementary materials

### **Exploring high-efficiency electrocatalysts of metal-doped two-dimensional C<sub>4</sub>N for oxygen reduction, oxygen evolution, and hydrogen evolution by first principles screening**

Xin Chen<sup>a,b,c,\*</sup>, Qifang Liu<sup>a</sup>, Hui Zhang<sup>a</sup>, Xiuyun Zhao<sup>d</sup>

<sup>a</sup> *Center for Computational Chemistry and Molecular Simulation, College of Chemistry and Chemical Engineering, Southwest Petroleum University, Chengdu 610500, China*

<sup>b</sup> *State Key Laboratory of Oil and Gas Reservoir Geology and Exploitation, Southwest Petroleum University, Chengdu 610500, China*

<sup>c</sup> *Oil & Gas Field Applied Chemistry Key Laboratory of Sichuan Province, College of Chemistry and Chemical Engineering, Southwest Petroleum University, Chengdu 610500, China*

<sup>d</sup> *Department of Applied Physics, University of Eastern Finland, Kuopio 70211, Finland*

---

\*Corresponding author.

E-mail address: [chenxin830107@pku.edu.cn](mailto:chenxin830107@pku.edu.cn) (X. Chen)

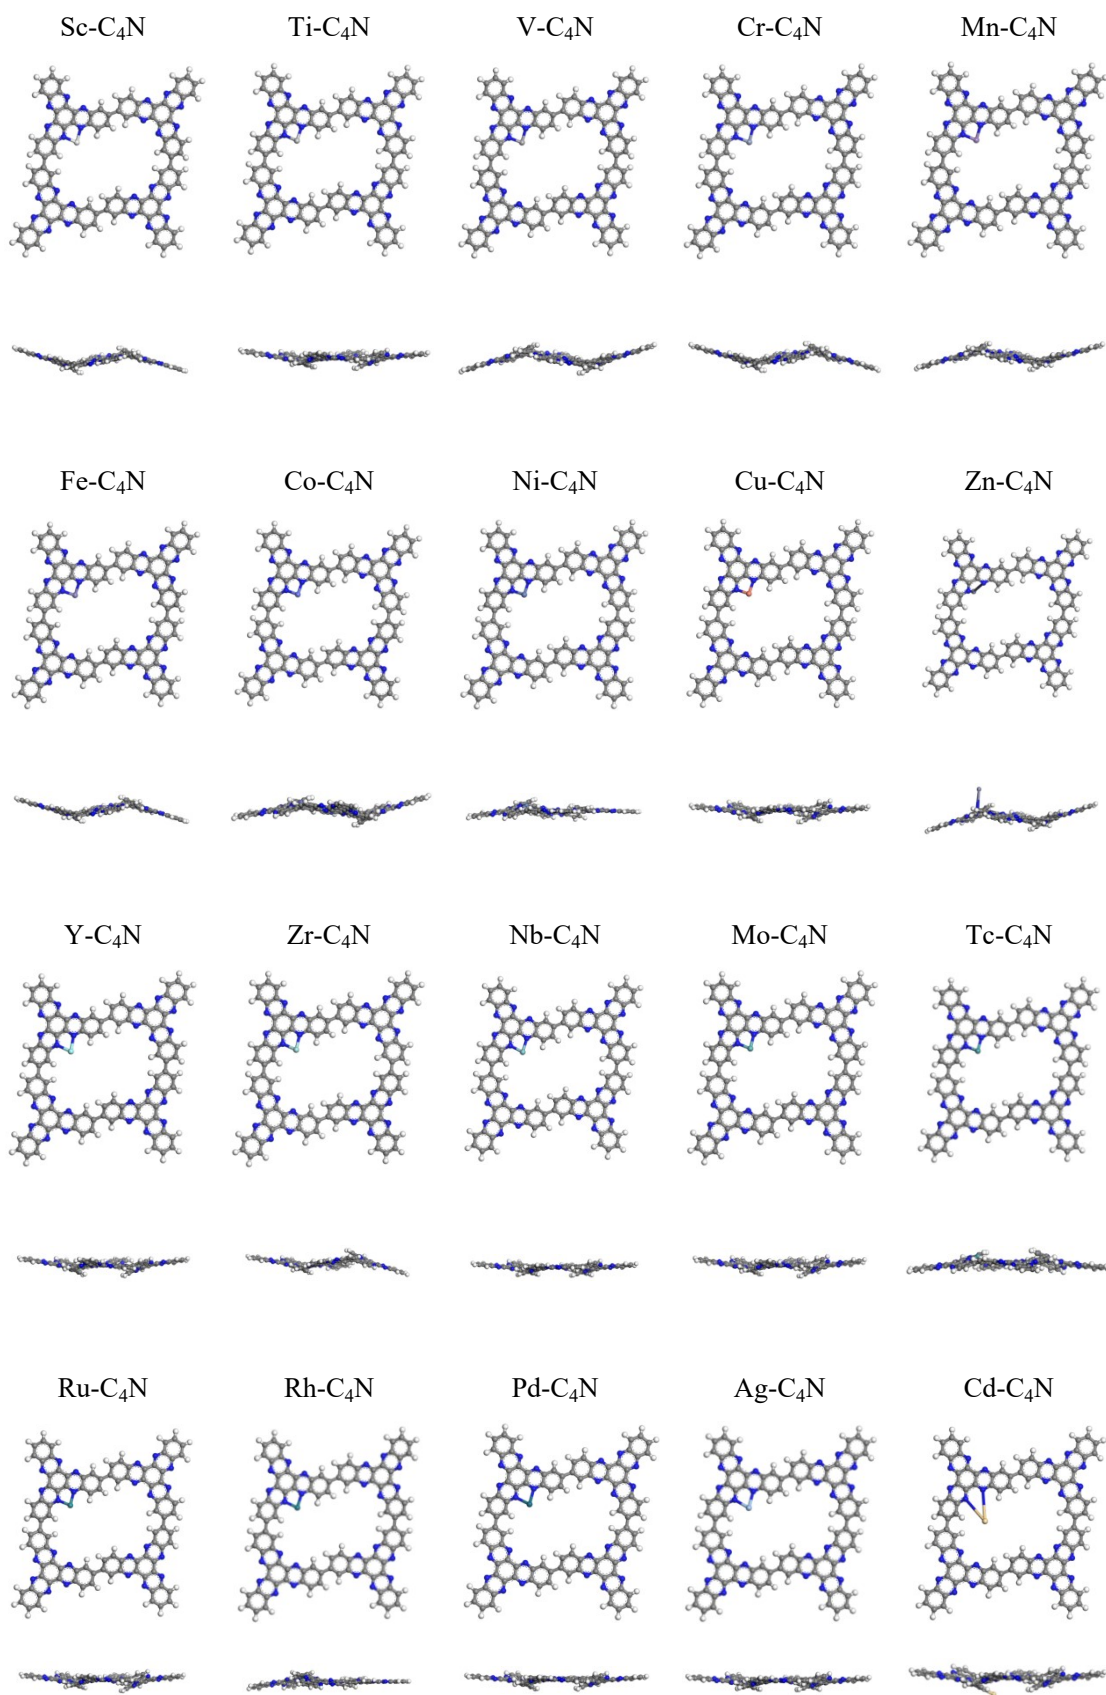

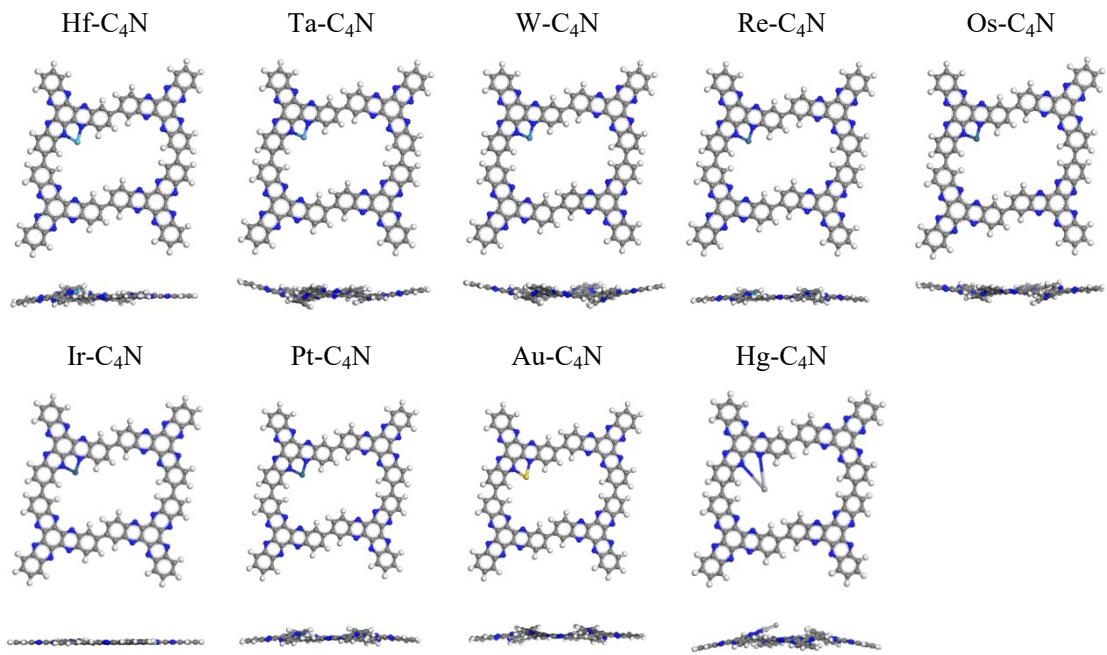

**Fig. S1.** Optimized geometries of all TM-C<sub>4</sub>N.

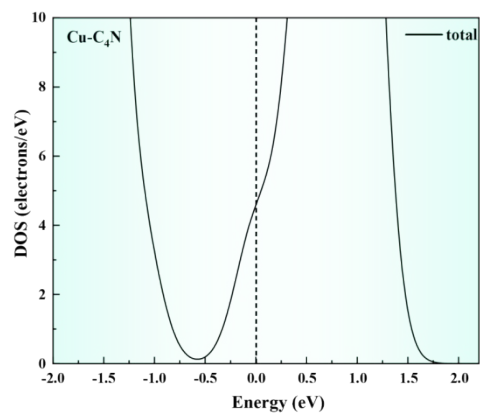

**Fig. S2.** Corresponding magnified pattern of DOS on Cu-C<sub>4</sub>N near the Fermi level.

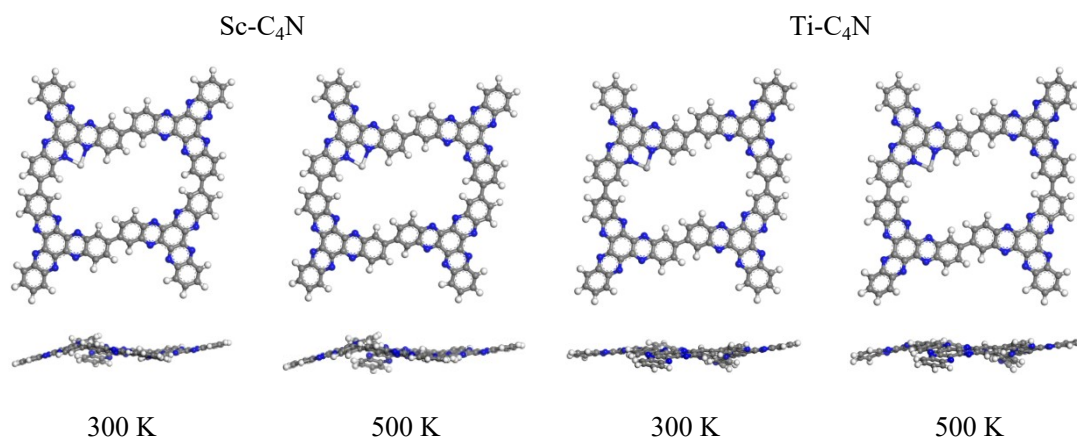

**Fig. S3.** Final structures of Sc-C<sub>4</sub>N and Ti-C<sub>4</sub>N after dynamics calculations.

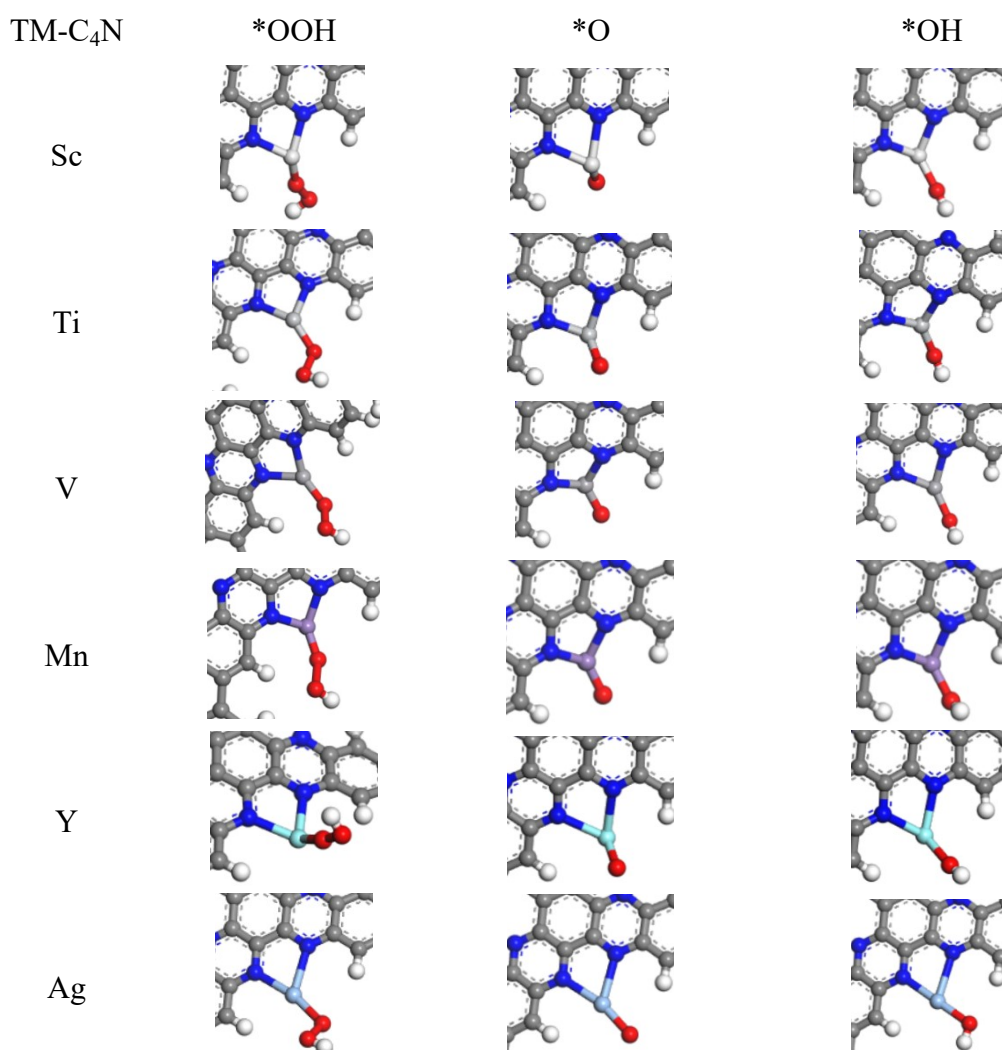

**Fig. S4.** Optimized structures of \*OOH, \*O, and \*OH species on TM-C<sub>4</sub>N.

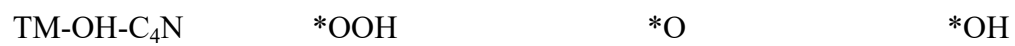

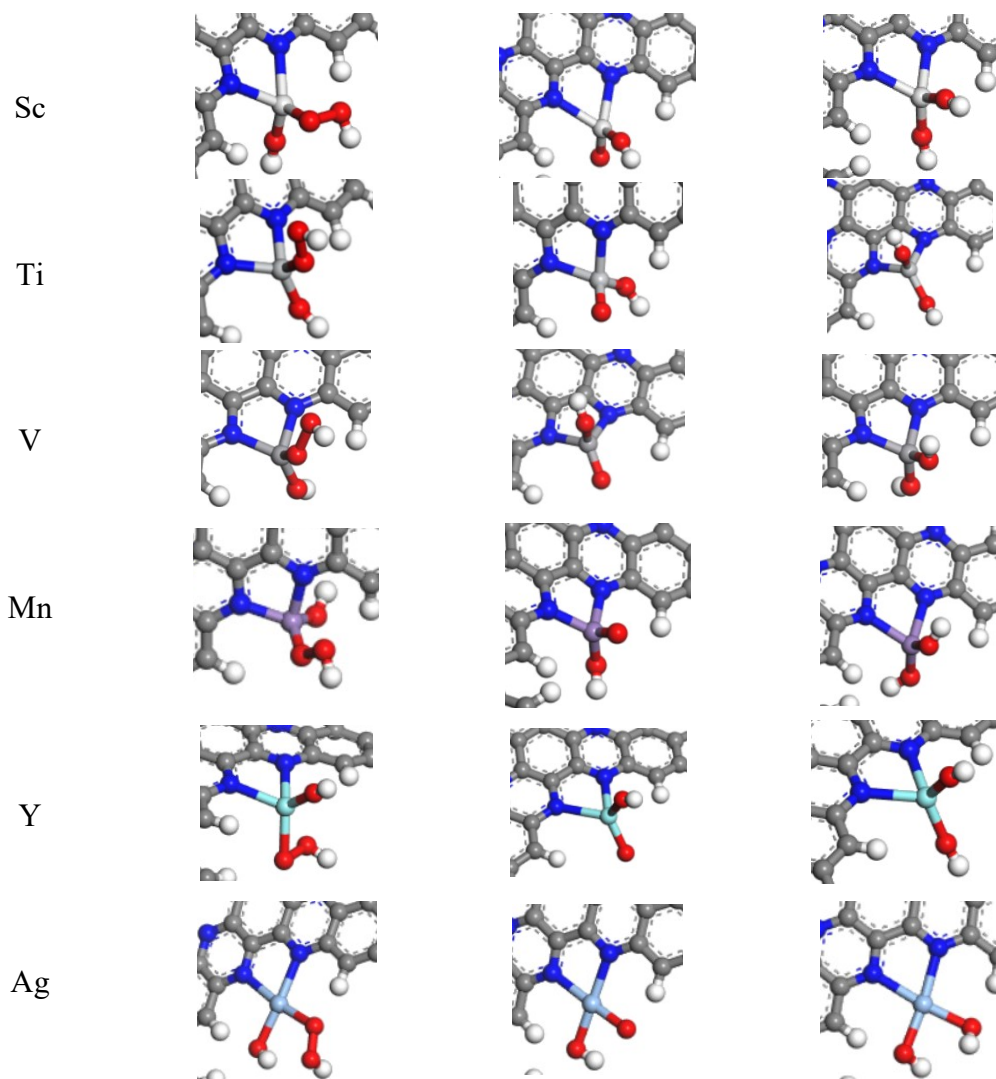

**Fig. S5.** Optimized structures of \*OOH, \*O, and \*OH species on all TM-OH-C<sub>4</sub>N.

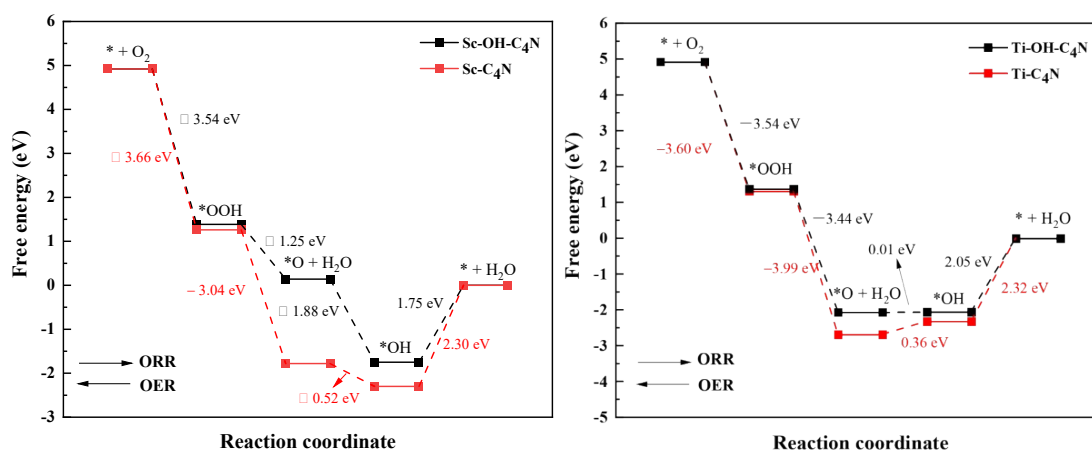

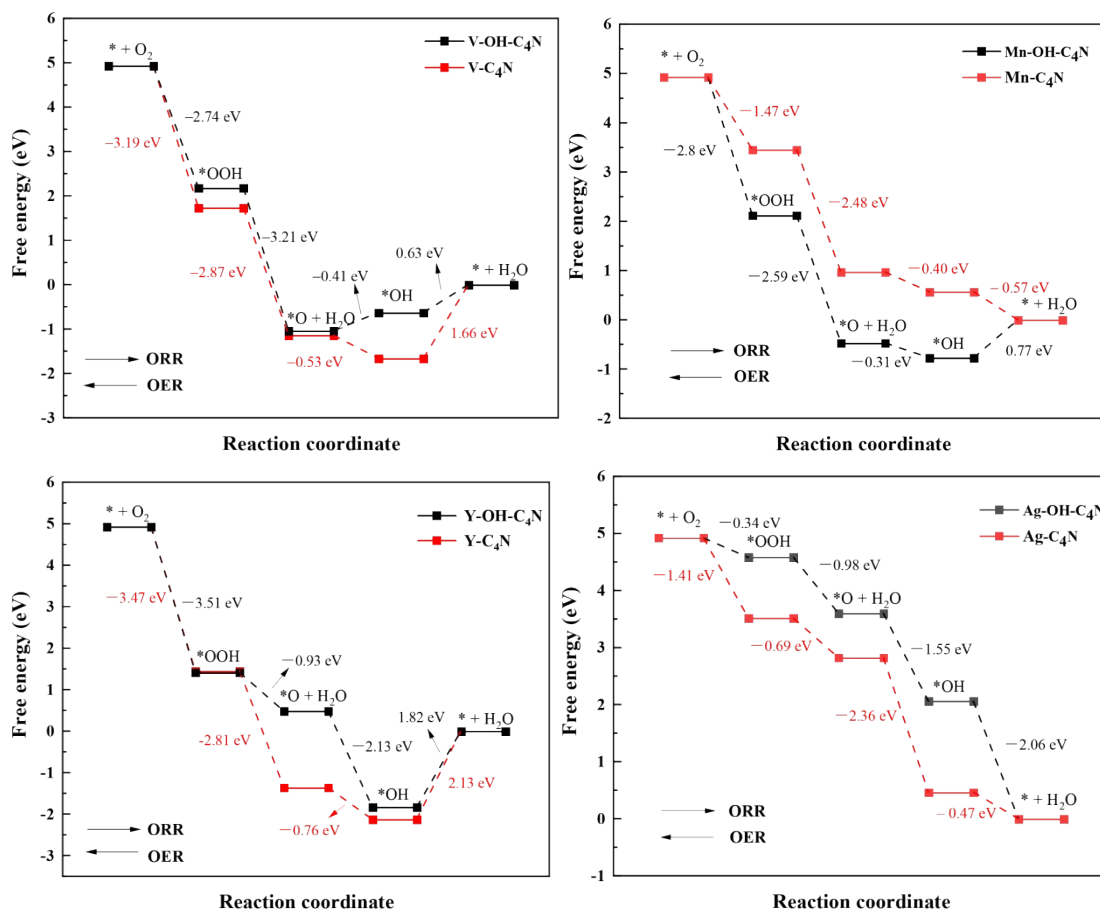

**Fig. S6.** Free energy profiles for OER/ORR on other TM-C<sub>4</sub>N and TM-OH-C<sub>4</sub>N.

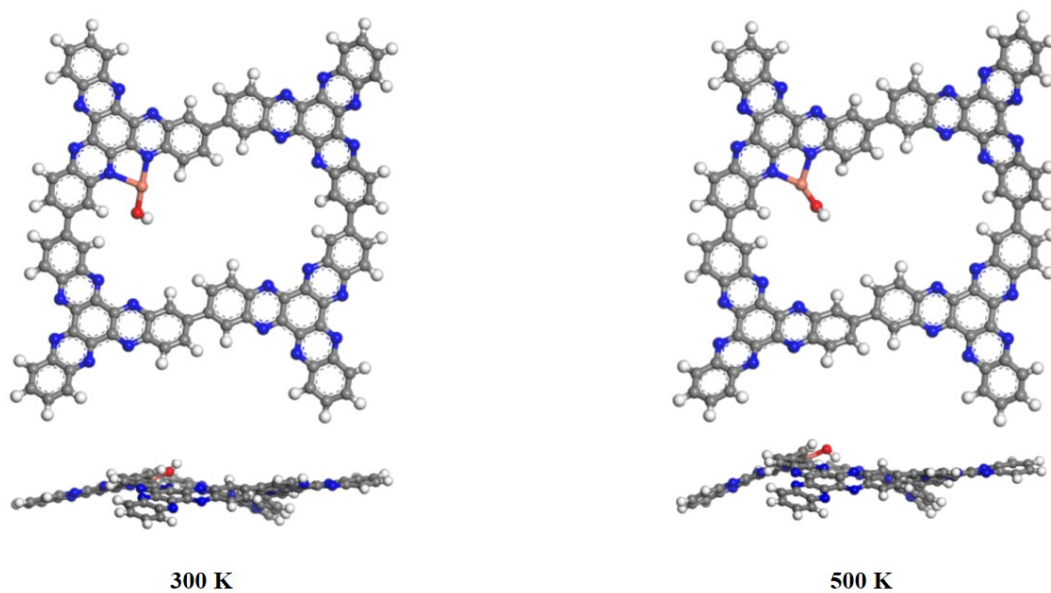

**Fig. S7.** Final structures of Cu-OH-C<sub>4</sub>N after dynamics calculations.

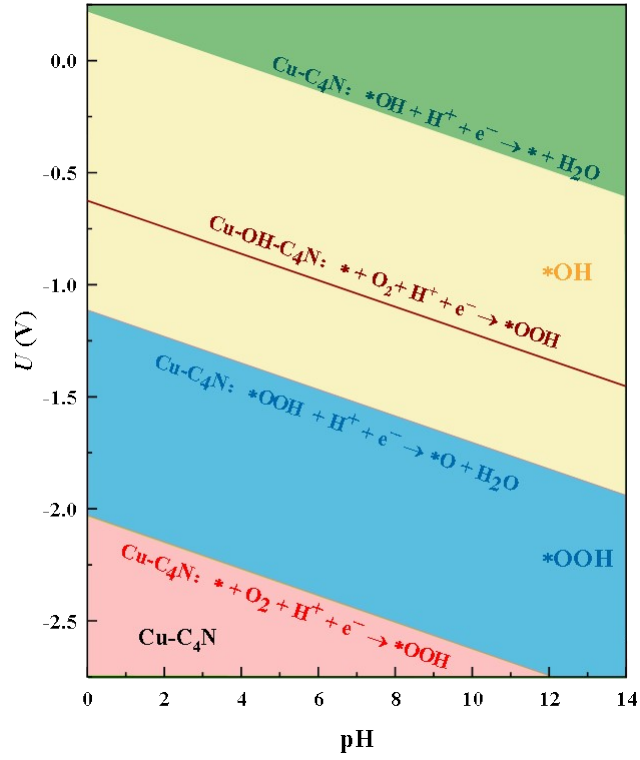

**Fig. S8.** Pourbaix plots of Cu-C<sub>4</sub>N and Cu-OH-C<sub>4</sub>N.

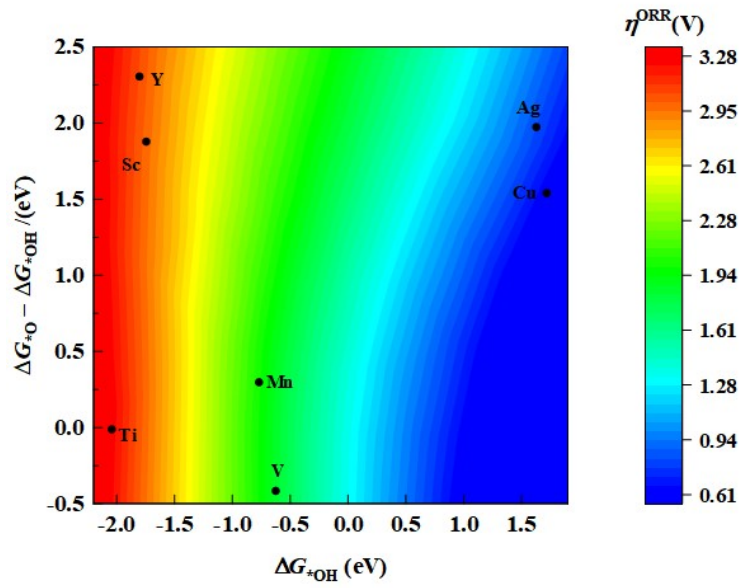

**Fig. S9.** Volcano diagram of ORR for TM-OH-C<sub>4</sub>N.

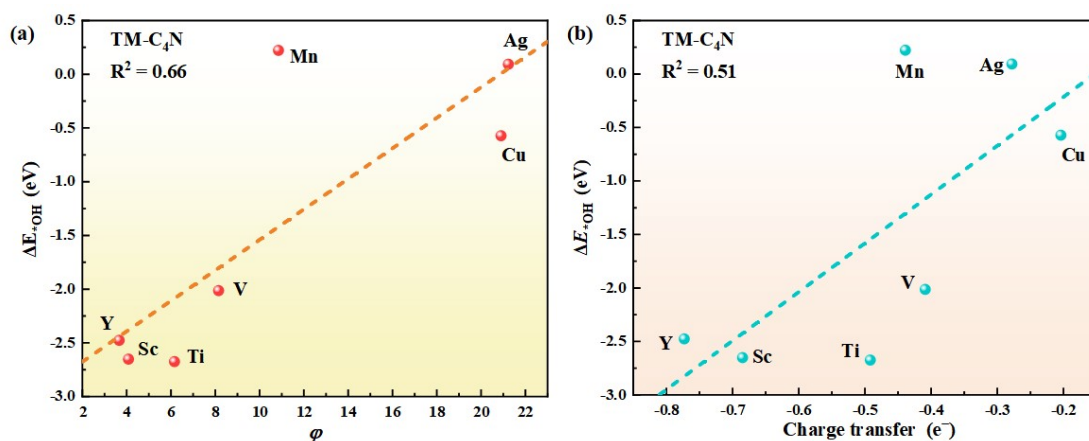

**Fig. S10.** Relationships between  $\Delta E^*_{OH}$  and (a) descriptor  $\varphi$  as well as (b) charge transfer on TM-C<sub>4</sub>N.

**Table S1** Mulliken charge (e) of the metal atoms and the surrounding N atoms of TM-C<sub>4</sub>N.

| TM-C <sub>4</sub> N | Sc-   | Ti-   | V-    | Mn-   | Cu-   | Zn-   | Y-    | Ag-   | Cd-   | Hg-   |
|---------------------|-------|-------|-------|-------|-------|-------|-------|-------|-------|-------|
| TM atom             | 0.685 | 0.492 | 0.409 | 0.439 | 0.204 | 0.018 | 0.773 | 0.278 | 0.025 | 0.009 |
| N atom              | -0.60 | -0.54 | -0.4  | -0.48 | -0.39 | -0.26 | -0.63 | -0.39 | -0.26 | -0.25 |

**Table S2**  $E_f$  values (eV) of TM-C<sub>4</sub>N and TM<sub>2</sub>-C<sub>4</sub>N.

| Catalyst                          | Sc-   | Ti-   | Cu-   |
|-----------------------------------|-------|-------|-------|
| TM-C <sub>4</sub> N               | -1.44 | -0.01 | -0.54 |
| TM <sub>2</sub> -C <sub>4</sub> N | -0.02 | 1.07  | 0.08  |

**Table S3** Corresponding values of  $N_e$  and  $N_m$  of TM.

| TM-C <sub>4</sub> N | Sc-  | Ti-  | V-   | Mn-  | Cu-  | Y-   | Ag-  |
|---------------------|------|------|------|------|------|------|------|
| $N_e$               | 3    | 4    | 5    | 7    | 11   | 3    | 11   |
| $N_m$               | 1.36 | 1.54 | 1.63 | 1.55 | 1.90 | 1.22 | 1.93 |
